# Supplementary material for: Independent divergences of the aquaporins across different genera highlight the distinct adaptation mechanisms within Mytilida
Source: Research Square preprint supplement (doi:10.21203/rs.3.rs-5381283/v1), 2025-11-01
Supplement: Supplementary file 1 [file Table S.xlsx]

## Sheet: Table S1
	Table S1 Selected genome assemblies for different mussels in this study.
	Order	Family	Subfamily	Genus	Species name		Genome Assembly	Accessed date	Length	Scaffolds	N50	Genes	Complete BUSCO	Location	Environments	Transcriptomes support
	Mytilida	Modiolidae	Limnoperninae	Limnoperna	Limnoperna fortunei	G1	GCA_944474755.1	2023.02.17	1335578634	310	97051362	34865	0.917	Brazil: Taquari River	Freshwater	Yes
						G2	GCA_944589985.1	2023.02.17	1391583978	1678	1576211	/	/
			Bathymodiolinae	Bathymodiolus	Bathymodiolus brooksi	G1	GCA_963680875.1	2024.04.09	2002743846	154	130391405	23050	0.879	USA: Mississippi Canyon	Cold seep	No
						G2	GCA_963680835.1	2024.04.09	2252046689	14015	577787	/	/
					Bathymodiolus heckerae	G1	GCA_965117275.1	2025.03.09	1551542465	67	112391484	34940	0.923	USA: Blake Ridge	Cold seep	No
						G2	GCA_965117265.1	2025.03.09	1791741785	38013	84561	/	/
					Bathymodiolus septemdierum	G1	GCA_963383655.1	2024.04.09	1428164251	151	99657287	27427	0.917	Tonga: Tui Malila Vent Field	Hydrothermal vent	No
						G2	GCA_963383625.1	2024.04.09	1308415011	8524	318673	/	/
				Gigantidas	Gigantidas childressi	G1	GCA_965235005.1	2025.07.21	1684459448	2816	96697973	30922	0.906	USA: Baltimore Canyon	Cold seep	No
						G2	GCA_965235055.1	2025.07.21	1807486914	3677	83720253	/	/
		Mytilidae	Mytiliseptinae	Mytilisepta	Mytilisepta virgata		GCA_028015205.1	2023.03.20	1034479799	109	63395483	26013	0.857	China: Fujian	Marine	Yes
			Crenellinae	Arcuatula	Arcuatula senhousia		GCA_963971305.1	2024.04.09	1036841959	1868	61823605	21562	0.912	UK: Southampton	Marine	No
				Perna	Perna viridis		GCA_037379345.1	2024.04.09	723115551	46	49738958	18930	0.849	India: Kerala	Marine	Yes
			Mytilinae	Mytilus	Mytilus californianus		GCF_021869535.1	2023.03.20	1651966901	176	117871512	26243	0.931	USA: McClures Beach	Marine	No
					Mytilus coruscus		GCA_017311375.1	2021.05.21	1552055356	4275	99542347	37481	0.93	China: Zhejiang	Marine	Yes
					Mytilus chilensis		https://doi.org/10.6084/m9.figshare.20995963	2023.06.11	2193074888	98	158301194	57766	0.863	Chile: Puerto Mont	Marine	No
					Mytilus trossulus		GCF_036588685.1	2024.03.20	1298590643	541	85406108	34237	0.954	USA: San Juan Island	Marine	Yes
					Mytilus edulis	G1	GCA_019925275.1	2024.04.22	1651313236	1119	116503180	52342	0.9	Canada: Prince Edward Island	Marine	Yes
						G2	GCA_963676685.2	2024.04.22	1368430993	2369	93447462	35129	0.926	UK: Pembroke shire
						G3	GCA_025276775.1	2024.04.22	1764168478	28192	77102752	57215	0.88	Russia: Barents Sea
					Mytilus galloprovincialis	G1	GCA_025277285.1	2023.02.17	1658655998	41122	71952646	41195	0.854	France: Sete	Marine	Yes
						G2	https://doi.org/10.6084/m9.figshare.22759397	2024.04.12	1881805340	14	137035627	77823	0.897	Spain: Galicia
						G3	GCA_037788925.1	2024.08.02	1414122127	94	96880329	58481	0.897	China: Shandong

## Sheet: Table S2
	Table S2 Selected transcriptomic data for de novo assemble in this study.
	Species	Tissue	Run No.	Bytes (Gb)	Application	Accessed date
	Limnoperna fortunei	Mix	ERR9503467	2.19	de novo assembly	2024.07.11
	Bathymodiolus heckerae	Mix	ERR13866182	3.72	Annotation	2025.03.10
	Gigantidas childressi	Mix	ERR14075531	3.81	Annotation	2025.07.21
	Mytilisepta virgata	Digestive gland	SRR5201009	1.95	de novo assembly	2025.09.30
	Arcuatula senhousia	Mix	ERR12245579	3.2	Annotation	2024.04.09
	Perna viridis	Mix	SRR26189005	1.84	Annotation & de novo assembly	2024.04.09
	Perna viridis	Mix	SRR10902200	2.68	Annotation & de novo assembly	2024.04.09
	Mytilus coruscus	Mix	SRR12328039	2.05	de novo assembly	2024.06.25
	Mytilus trossulus	Mix	SRR6051615	1.01	de novo assembly	2024.04.10
	Mytilus edulis	Mix	SRR6051614	0.81	de novo assembly	2024.04.10
	Mytilus galloprovincialis	Mix	SRR6051613	1.03	de novo assembly	2024.04.10

## Sheet: Table S3
	Table S3 Chromosomal location of the identified AQP orthologs in selected species
	Species	Gene Names	Chromosome Name	Chromosome No.	Start	End	Strand
	Ase	AseAqpg1	OZ020305.1	3	5595510	5603089	-
	Ase	AseAqpg2	OZ020305.1	3	44404527	44418000	+
	Ase	AseAqpc5	OZ020306.1	4	25312035	25314552	+
	Ase	AseAqpc62	OZ020306.1	4	49221526	49229184	-
	Ase	AseAqpc61	OZ020306.1	4	49236578	49249391	-
	Ase	AseAqpc41	OZ020306.1	4	57012609	57020631	-
	Ase	AseAqpc42	OZ020306.1	4	57071348	57077326	-
	Ase	AseAqp8a	OZ020307.1	5	12736532	12738473	-
	Ase	AseAqpc2	OZ020310.1	8	52088152	52098202	-
	Ase	AseAqpc1	OZ020311.1	9	25455273	25465956	+
	Ase	AseAqpc31	OZ020311.1	9	37974431	37976996	-
	Ase	AseAqpc32	OZ020311.1	9	37978669	37981546	-
	Ase	AseAqpc2p	OZ020313.1	11	26061861	26064896	+
	Ase	AseAqps3	OZ020315.1	13	31961465	31962690	+
	Ase	AseAqps1	OZ020315.1	13	34897585	34899226	+
	Ase	AseAqps2	OZ020315.1	13	39289219	39290717	-
	Bbr	BbrAqpg1	OY804577.1	3	52623916	52638666	+
	Bbr	BbrAqpg2	OY804577.1	3	118867638	118888008	-
	Bbr	BbrAqpc4	OY804578.1	4	51883377	51924296	+
	Bbr	BbrAqpc5	OY804578.1	4	81240920	81248253	+
	Bbr	BbrAqpc62	OY804578.1	4	108859063	108875205	-
	Bbr	BbrAqpc61	OY804578.1	4	108891005	108900041	-
	Bbr	BbrAqp81	OY804579.1	5	57456900	57471190	+
	Bbr	BbrAqp82	OY804579.1	5	57515633	57529072	+
	Bbr	BbrAqpc2	OY804583.1	9	40271556	40286176	+
	Bbr	BbrAqpc31	OY804584.1	10	32030250	32032427	+
	Bbr	BbrAqpc1	OY804584.1	10	32060821	32072519	+
	Bbr	BbrAqpc32	OY804584.1	10	32195634	32205397	-
	Bbr	BbrAqpc33	OY804584.1	10	32234676	32242551	-
	Bbr	BbrAqpc34	OY804584.1	10	32268345	32275085	-
	Bbr	BbrAqpc35	OY804584.1	10	32303473	32310558	-
	Bbr	BbrAqps11	OY804587.1	13	21527730	21529498	+
	Bbr	BbrAqps12	OY804587.1	13	48469642	48471778	-
	Bbr	BbrAqps3	OY804587.1	13	63957183	63958756	+
	Bbr	BbrAqps2	OY804587.1	13	64355039	64356600	+
	Bhe	BheAqpg2	OZ221025.1	4	25219263	25239026	+
	Bhe	BheAqpg1	OZ221025.1	4	86926266	86946410	-
	Bhe	BheAqpc4	OZ221026.1	5	37261703	37312050	+
	Bhe	BheAqpc5	OZ221026.1	5	58819837	58828313	-
	Bhe	BheAqpc62	OZ221026.1	5	86414814	86427575	-
	Bhe	BheAqpc61	OZ221026.1	5	86436497	86448772	-
	Bhe	BheAqp8	OZ221027.1	6	53467683	53480867	+
	Bhe	BheAqpc2	OZ221030.1	9	58270194	58285570	-
	Bhe	BheAqpc2p1	OZ221031.1	10	31063175	31095372	-
	Bhe	BheAqpc2p2	OZ221031.1	10	31114382	31132337	-
	Bhe	BheAqps3	OZ221032.1	11	31663181	31664723	+
	Bhe	BheAqps2	OZ221032.1	11	31878807	31880454	+
	Bhe	BheAqps12	OZ221032.1	11	41959754	41961983	-
	Bhe	BheAqps11	OZ221032.1	11	57971410	57973277	-
	Bhe	BheAqpc31	OZ221034.1	13	57496045	57500238	+
	Bhe	BheAqpc1	OZ221034.1	13	57535223	57546705	+
	Bhe	BheAqpc32	OZ221034.1	13	58397565	58406449	+
	Bhe	BheAqpc33	OZ221034.1	13	58434484	58442648	+
	Bse	BseAqps3	OY726517.1	1	29542603	29544155	+
	Bse	BseAqps2	OY726517.1	1	29891262	29892915	+
	Bse	BseAqps12	OY726517.1	1	38941490	38943506	-
	Bse	BseAqps11	OY726517.1	1	52050421	52052284	-
	Bse	BseAqpg1	OY726520.1	4	22519499	22537365	+
	Bse	BseAqpg2	OY726520.1	4	72309941	72331310	-
	Bse	BseAqpc4	OY726521.1	5	35913639	35951939	+
	Bse	BseAqpc5	OY726521.1	5	56165332	56172792	+
	Bse	BseAqpc62	OY726521.1	5	81403071	81420189	-
	Bse	BseAqpc61	OY726521.1	5	81431782	81441349	-
	Bse	BseAqp8	OY726522.1	6	24738328	24751509	+
	Bse	BseAqpc2	OY726522.1	6	29399627	29414702	+
	Bse	BseAqpc3	OY726529.1	13	54859148	54866456	+
	Bse	BseAqpc1	OY726529.1	13	54907234	54917970	-
	Bse	BseAqpc32	OY726529.1	13	54944333	54949890	-
	Gch	GchiAqpg1	OZ249387.1	3	73653591	73665268	-
	Gch	GchiAqpg2	OZ249387.1	3	90606876	90614245	-
	Gch	GchiAqp8	OZ249388.1	4	60910134	60914254	+
	Gch	GchiAqpc4	OZ249389.1	5	28639722	28682341	+
	Gch	GchiAqpc5	OZ249389.1	5	64102820	64112406	+
	Gch	GchiAqpc61	OZ249389.1	5	91133726	91154347	+
	Gch	GchiAqpc62	OZ249389.1	5	91164572	91174128	+
	Gch	GchiAqpc21	OZ249392.1	8	65252315	65271879	-
	Gch	GchiAqpc22	OZ249392.1	8	65286438	65295537	+
	Gch	GchiAqpc2p1	OZ249393.1	9	10804183	10812855	+
	Gch	GchiAqpc2p2	OZ249393.1	9	10822199	10851803	+
	Gch	GchiAqps12	OZ249395.1	11	4730977	4733222	-
	Gch	GchAqps3	OZ249395.1	11	45385103	45386703	+
	Gch	GchAqps2	OZ249395.1	11	45775777	45778278	+
	Gch	GchiAqps11	OZ249395.1	11	73956301	73956942	+
	Gch	GchiAqpc31	OZ249397.1	13	20003977	20015919	+
	Gch	GchiAqpc11	OZ249397.1	13	20029160	20038853	+
	Gch	GchiAqpc32	OZ249397.1	13	20066621	20084755	+
	Gch	GchiAqpc12	OZ249397.1	13	20085052	20094733	+
	Lfo	LfoAqpc5	OX104112.1	2	58941105	58942080	+
	Lfo	LfoAqpc61a1	OX104112.1	2	73558046	73561158	+
	Lfo	LfoAqpc61a2	OX104112.1	2	73566220	73570457	+
	Lfo	LfoAqpc62	OX104112.1	2	73573852	73579452	+
	Lfo	LfoAqpc4	OX104112.1	2	80862804	80873260	-
	Lfo	LfoAqpc61b	OX104113.1	3	46748083	46747220	-
	Lfo	LfoAqpc31	OX104114.1	4	97508537	97512622	+
	Lfo	LfoAqpc32	OX104114.1	4	97551157	97563003	+
	Lfo	LfoAqpc11	OX104114.1	4	97601155	97612193	+
	Lfo	LfoAqpc12	OX104114.1	4	97623925	97639340	+
	Lfo	LfoAqpc61c1	OX104116.1	6	40859100	40863722	-
	Lfo	LfoAqpc61c2	OX104116.1	6	40870939	40872505	-
	Lfo	LfoAqpc61c3	OX104116.1	6	40894645	40897447	-
	Lfo	LfoAqpc61c4	OX104116.1	6	40903849	40906801	-
	Lfo	LfoAqpc61c5	OX104116.1	6	40912812	40915177	-
	Lfo	LfoAqpc61c6	OX104116.1	6	40929968	40932174	-
	Lfo	LfoAqpc61c7	OX104116.1	6	40945398	40947863	-
	Lfo	LfoAqpg1	OX104116.1	6	61338926	61349022	-
	Lfo	LfoAqpg2	OX104116.1	6	82546989	82551799	+
	Lfo	LfoAqp8a1	OX104117.1	7	29794455	29799917	+
	Lfo	LfoAqp8a2	OX104117.1	7	29804655	29810053	+
	Lfo	LfoAqpc61d	OX104118.1	8	58140308	58141180	+
	Lfo	LfoAqps2	OX104119.1	9	60491481	60492974	+
	Lfo	LfoAqps1	OX104119.1	9	63955200	63956496	+
	Lfo	LfoAqps3	OX104119.1	9	69185169	69187660	+
	Lfo	LfoAqpc2	OX104124.1	14	18482211	18486756	+
	Mca	McaAqpc2	NW_026262615.1	13	40038134	40046460	+
	Mca	McaAqpc1	NW_026262668.1	2	58987377	58996362	-
	Mca	McaAqpc3	NW_026262668.1	2	59037111	59040937	-
	Mca	McaAqps2	NW_026262668.1	2	97464806	97467893	+
	Mca	McaAqps1	NW_026262668.1	2	135462829	135465155	-
	Mca	McaAqps3	NW_026262668.1	2	137920107	137922531	+
	Mca	McaAqpg111	NW_026262679.1	3	20931232	20939220	-
	Mca	McaAqpg121	NW_026262679.1	3	20948942	20954511	-
	Mca	McaAqpg112	NW_026262679.1	3	20967640	20975092	-
	Mca	McaAqpg122	NW_026262679.1	3	20977650	20989333	-
	Mca	McaAqpg2	NW_026262679.1	3	26383287	26416843	+
	Mca	McaAqpc4	NW_026262701.1	5	49033477	49073590	+
	Mca	McaAqpc5	NW_026262701.1	5	72854092	72859749	+
	Mca	McaAqpc62	NW_026262701.1	5	119432465	119442186	-
	Mca	McaAqpc61	NW_026262701.1	5	119447765	119455486	-
	Mca	McaAqp8a	NW_026262723.1	7	70280115	70289814	-
	Mca	McaAqp8f	NW_026262723.1	7	70334096	70342480	+
	Mch	MchAqps2	Chr06	6	1615954	1617688	-
	Mch	MchAqps11	Chr06	6	12324556	12326569	-
	Mch	MchAqps12	Chr06	6	12420616	12423345	-
	Mch	MchAqps31	Chr06	6	15908462	15911345	+
	Mch	MchAqps32	Chr06	6	15961794	15964656	+
	Mch	MchAqpc3	Chr06	6	78682231	78685923	+
	Mch	MchAqpc11	Chr06	6	78707152	78719109	+
	Mch	MchAqpc12	Chr06	6	79037801	79053173	-
	Mch	MchAqps13	Chr07	7	70436040	70438017	-
	Mch	MchAqpc5	Chr08	8	33924854	33927272	+
	Mch	MchAqpc4a	Chr08	8	112868985	112896073	-
	Mch	MchAqpc622	Chr08	8	116019831	116026641	-
	Mch	MchAqpc623	Chr08	8	116077378	116086400	+
	Mch	MchAqpc621	Chr08	8	116149521	116155190	-
	Mch	MchAqpc61	Chr08	8	116189591	116202364	-
	Mch	MchAqp8c	Chr09	9	72317554	72318654	+
	Mch	MchAqp8b	Chr09	9	72328242	72336499	+
	Mch	MchAqp8a	Chr09	9	72359430	72362185	+
	Mch	MchAqp8f	Chr09	9	73450153	73460860	-
	Mch	MchAqp8e	Chr09	9	73469388	73479170	+
	Mch	MchAqp8d	Chr09	9	73496318	73502362	+
	Mch	MchAqp8c2	Chr09	9	73514804	73518677	+
	Mch	MchAqp8b2	Chr09	9	73528279	73532418	+
	Mch	MchAqp8c3	Chr09	9	73551950	73555748	+
	Mch	MchAqp8b3	Chr09	9	73566277	73570811	+
	Mch	MchAqpg111	Chr10	10	67632528	67640226	-
	Mch	MchAqpg121	Chr10	10	67641347	67650199	-
	Mch	MchAqpg112	Chr10	10	67844531	67851850	-
	Mch	MchAqpg122	Chr10	10	67852916	67862418	-
	Mch	MchAqpg21	Chr10	10	88022857	88037102	-
	Mch	MchAqpg22	Chr10	10	88409031	88426269	+
	Mch	MchAqpc4b	Chr11	11	44397736	44398300	+
	Mch	MchAqpc4c	Chr11	11	52957373	52978116	+
	Mch	MchAqpc21	Chr12	12	13798902	13808401	-
	Mch	MchAqpc22	Chr12	12	14113546	14123143	+
	Mco	McoAqps3	CM029596.1	2	3338879	3341013	-
	Mco	McoAqps1	CM029596.1	2	6141960	6143916	+
	Mco	McoAqps2	CM029596.1	2	45211294	45214495	-
	Mco	McoAqpc1	CM029596.1	2	113354776	113362178	-
	Mco	McoAqpc3	CM029596.1	2	113393418	113397040	-
	Mco	McoAqpc4	CM029600.1	6	45785454	45816243	-
	Mco	McoAqpc5	CM029600.1	6	47846588	47851730	-
	Mco	McoAqpc62	CM029600.1	6	99657981	99669268	-
	Mco	McoAqpc61	CM029600.1	6	99673987	99681082	-
	Mco	McoAqpg111	CM029601.1	7	20103008	20123671	-
	Mco	McoAqpg121	CM029601.1	7	20133716	20146534	-
	Mco	McoAqpg112	CM029601.1	7	20217787	20229177	-
	Mco	McoAqpg122	CM029601.1	7	20230854	20238749	-
	Mco	McoAqpg2	CM029601.1	7	24895992	24916342	+
	Mco	McoAqp8e	CM029602.1	8	44157474	44164367	-
	Mco	McoAqp8f1	CM029602.1	8	44170102	44174842	+
	Mco	McoAqp8f2	CM029602.1	8	44288361	44290395	+
	Mco	McoAqp8b1	CM029602.1	8	46329807	46333614	-
	Mco	McoAqp8b2	CM029602.1	8	46367101	46371138	+
	Mco	McoAqp8a	CM029602.1	8	46437364	46457800	+
	Mco	McoAqpc2	CM029606.1	12	47217570	47220486	-
	Mco	McoAqpc3b1	CM029608.1	14	9313183	9316948	-
	Mco	McoAqpc3b2	CM029608.1	14	9340786	9344508	-
	Mco	McoAqpc3b3	CM029608.1	14	9354836	9358595	+
	Med	MedAqpc4	CM034352.1	4	52903078	52924091	-
	Med	MedAqpc5	CM034352.1	4	69757097	69761869	+
	Med	MedAqpc62	CM034352.1	4	113924107	113930011	-
	Med	MedAqpc61	CM034352.1	4	113935399	113960533	-
	Med	MedAqps3	CM034353.1	5	2792746	2796814	-
	Med	MedAqps1	CM034353.1	5	4600602	4603905	+
	Med	MedAqps2	CM034353.1	5	21255682	21257372	+
	Med	MedAqpc1	CM034353.1	5	52052530	52060495	-
	Med	MedAqpc3	CM034353.1	5	52091083	52098795	-
	Med	MedAqpg1	CM034355.1	7	88415453	88423809	-
	Med	MedAqpg2	CM034355.1	7	88424958	88448147	-
	Med	MedAqp8h1	CM034356.1	8	48238406	48247018	-
	Med	MedAqp8g	CM034356.1	8	48254895	48265439	-
	Med	MedAqp8h2	CM034356.1	8	48280182	48283475	+
	Med	MedAqp8d1	CM034356.1	8	48296318	48297285	-
	Med	MedAqp8h3	CM034356.1	8	48325419	48334231	-
	Med	MedAqp8h4	CM034356.1	8	48342064	48351094	-
	Med	MedAqp8e1	CM034356.1	8	48353762	48361640	+
	Med	MedAqp8d2	CM034356.1	8	48379663	48386203	+
	Med	MedAqp8b1	CM034356.1	8	48396083	48402003	+
	Med	MedAqp8c1	CM034356.1	8	48422145	48426606	+
	Med	MedAqp8b2	CM034356.1	8	48433363	48451997	+
	Med	MedAqp8a	CM034356.1	8	48471663	48477821	+
	Med	MedAqp8e2	CM034356.1	8	60884851	60891738	-
	Med	MedAqpc2	CM034362.1	14	50690420	50702285	+
	Mga	MgaAqps31	CM046167.1	2	1611010	1615778	-
	Mga	MgaAqps32	CM046167.1	2	1670470	1682770	-
	Mga	MgaAqps1	CM046167.1	2	3339371	3341782	+
	Mga	MgaAqps2	CM046167.1	2	27599739	27601295	-
	Mga	MgaAqpc1	CM046167.1	2	75790823	75811346	-
	Mga	MgaAqpc3	CM046167.1	2	75823507	75827155	-
	Mga	MgaAqpc4	CM046171.1	6	36692321	36719002	-
	Mga	MgaAqpc5	CM046171.1	6	38740626	38743175	-
	Mga	MgaAqpc62	CM046171.1	6	77626701	77631470	-
	Mga	MgaAqpc61	CM046171.1	6	77650593	77659127	-
	Mga	MgaAqpg11	CM046172.1	7	13240593	13248947	-
	Mga	MgaAqpg12	CM046172.1	7	13251283	13271967	-
	Mga	MgaAqpg2	CM046172.1	7	16435362	16451269	+
	Mga	MgaAqp8b1	CM046173.1	8	29702161	29710286	-
	Mga	MgaAqp8d	CM046173.1	8	29716354	29722941	-
	Mga	MgaAqp8e1	CM046173.1	8	29746959	29751799	-
	Mga	MgaAqp8h1	CM046173.1	8	29754484	29760515	+
	Mga	MgaAqp8e2	CM046173.1	8	29939273	29950199	-
	Mga	MgaAqp8f	CM046173.1	8	29958574	29968231	+
	Mga	MgaAqp8g	CM046173.1	8	30005667	30015669	+
	Mga	MgaAqp8h2	CM046173.1	8	30023543	30032155	+
	Mga	MgaAqp8b2	CM046173.1	8	30348135	30352900	-
	Mga	MgaAqp8c1	CM046173.1	8	30358155	30362338	-
	Mga	MgaAqp8b3	CM046173.1	8	30389932	30398081	-
	Mga	MgaAqp8e3	CM046173.1	8	30448766	30455636	-
	Mga	MgaAqp8h3	CM046173.1	8	30459314	30472216	+
	Mga	MgaAqp8a	CM046173.1	8	31903968	31909800	+
	Mga	MgaAqpc2	CM046177.1	12	37777142	37784775	-
	Mtr	MtrAqps3	NC_086374.1	2	2190612	2193463	+
	Mtr	MtrAqps1	NC_086374.1	2	11058079	11059624	-
	Mtr	MtrAqps2	NC_086374.1	2	13412690	13413766	-
	Mtr	MtrAqpc1	NC_086374.1	2	50607841	50615946	-
	Mtr	MtrAqpc31	NC_086374.1	2	50632669	50636309	-
	Mtr	MtrAqpc32	NC_086374.1	2	58371922	58375782	+
	Mtr	MtrAqpg2	NC_086376.1	4	11794985	11816322	+
	Mtr	MtrAqpg12	NC_086376.1	4	20035956	20052954	+
	Mtr	MtrAqpg11	NC_086376.1	4	20055444	20063518	+
	Mtr	MtrAqpc62	NC_086378.1	6	1699711	1705564	-
	Mtr	MtrAqpc61	NC_086378.1	6	1726186	1732830	-
	Mtr	MtrAqpc5	NC_086378.1	6	34681353	34686222	-
	Mtr	MtrAqpc4	NC_086378.1	6	60724409	60741028	+
	Mtr	MtrAqp8a	NC_086379.1	7	37676572	37680739	-
	Mtr	MtrAqp8b	NC_086379.1	7	37699836	37703076	-
	Mtr	MtrAqp8c	NC_086379.1	7	37709575	37718425	-
	Mtr	MtrAqp8d	NC_086379.1	7	37736135	37741465	-
	Mtr	MtrAqp8g	NC_086379.1	7	37759082	37766147	+
	Mtr	MtrAqp8h	NC_086379.1	7	37773807	37782171	+
	Mtr	MtrAqpc21	NC_086383.1	11	17925865	17938647	+
	Mtr	MtrAqpc22	NC_086383.1	11	30697602	30715346	+
	Mtr	MtrAqpc23	NC_086383.1	11	33119923	33138763	-
	Mtr	MtrAqpc24	NC_086383.1	11	33454697	33479357	-
	Mvi	MviAqpc3	CM051510.1	3	41307754	41315975	+
	Mvi	MviAqpc1	CM051510.1	3	41333375	41339528	+
	Mvi	MviAqpc2	CM051512.1	5	19415456	19424358	+
	Mvi	MviAqps11	CM051514.1	7	9906211	9908385	-
	Mvi	MviAqps12	CM051514.1	7	20311576	20313891	+
	Mvi	MviAqps13	CM051514.1	7	20321839	20324548	+
	Mvi	MviAqps14	CM051514.1	7	20885898	20888216	+
	Mvi	MviAqps15	CM051514.1	7	20895879	20898931	+
	Mvi	MviAqps3	CM051514.1	7	24292910	24294451	-
	Mvi	MviAqps2	CM051514.1	7	35729346	35730856	+
	Mvi	MviAqpc2p	CM051515.1	8	4275711	4282785	+
	Mvi	MviAqpg1	CM051517.1	10	39681195	39697597	+
	Mvi	MviAqpg2	CM051517.1	10	69698718	69708208	-
	Mvi	MviAqpc5	CM051521.1	14	15930070	15932832	-
	Mvi	MviAqpc62	CM051521.1	14	39063221	39072184	-
	Mvi	MviAqpc61	CM051521.1	14	39083260	39086701	-
	Mvi	MviAqpc4	CM051521.1	14	40009455	40023373	-
	Mvi	MviAqp8	CM051521.1	14	107535177	107547111	-
	Pvi	PviAqpg1	CM074513.1	3	18673392	18681449	-
	Pvi	PviAqpg2	CM074513.1	3	58335037	58339500	+
	Pvi	PviAqp8	CM074514.1	4	15081266	15093149	-
	Pvi	PviAqpc41	CM074515.1	5	26362296	26366291	+
	Pvi	PviAqpc42	CM074515.1	5	26380480	26382297	-
	Pvi	PviAqpc62	CM074515.1	5	26921034	26925826	-
	Pvi	PviAqpc61	CM074515.1	5	26929835	26934894	-
	Pvi	PviAqpc5	CM074515.1	5	34375890	34380659	+
	Pvi	PviAqpc11	CM074517.1	7	26849756	26855323	-
	Pvi	PviAqpc12	CM074517.1	7	26911892	26915440	-
	Pvi	PviAqpc3	CM074517.1	7	46069693	46075513	+
	Pvi	PviAqps2	CM074521.1	11	16121284	16123528	-
	Pvi	PviAqps3	CM074521.1	11	27523426	27524522	-
	Pvi	PviAqps1	CM074521.1	11	27804201	27807781	-
	Pvi	PviAqpc2	CM074524.1	14	29356776	29368507	-

## Sheet: Table S4
	Table S4 Positive selection analyses on each AQP orthologs in mussels
		aBSREL				CodeML Positiver selection sites
		Tested	Positive selection	p-value	Node
	Aqpc1	15	0
	Aqpc3	23	0
	Aqpc2	15	0
	Aqpc2p	3	0
	Aqpc4	14	1	0.0484	Node24	No
	Aqpc5	11	0
	Aqpc61	21	1	0.02852	Node15	No
	Aqpc62	13	0
	Aqpg1	23	0
	Aqpg2	11	0
	Aqp8a	12	0
	Aqp8b	8	0
	Aqp8c	2	0
	Aqp8d	2	0
	Aqp8e	4	1	0.04277	Node5	No
	Aqp8f	1	0
	Aqp8g	0	0
	Aqp8h	4	0
	Aqps1	21	0
	Aqps2	11	0
	Aqps3	13	0
